# Supplementary material
Source: MDPI journal article supplement (https://www.mdpi.com/2077-1312/9/9/1022)
Supplement: s1 [file s1]

## Article

# Identifying Métiers Using Landings Profiles: An Octopus-Driven Multi-Gear Coastal Fleet

Monika J. Szynaka <sup>1,2,\*</sup>, Karim Erzini <sup>1,2</sup>, Jorge M. S. Gonçalves <sup>1,2</sup> and Aida Campos <sup>1,3</sup>

<sup>1</sup> CCMAR, Centro de Ciências do Mar do Algarve, Universidade do Algarve, Campus de Gambelas, 8 8005-139 Faro, Portugal; kerzini@ualg.pt (K.E.); jgoncal@ualg.pt (J.M.S.G.); acampos@ipma.pt (A.C.)

<sup>2</sup> FCT, Faculdade de Ciências e Tecnologia, Universidade do Algarve, 8005-139 Faro, Portugal

<sup>3</sup> IPMA, Instituto Português do Mar e da Atmosfera, Avenida Alfredo Magalhães Ramalho 6, 1495-165 Algés, Portugal

\* Correspondence: mjszynaka@gmail.com

**Abstract:** The multi-gear coastal vessels in the Algarve (South Portugal) own licenses for various fishing gears. However, it is generally uncertain what gears they use, which is problematic as each individual gear is responsible for unique impacts on the resources and the environment. In this study, landing profiles identified for the multi-gear coastal fleet (2012–2016) were used as support in defining potential métiers using k-mean clustering analysis (CLARA) along with information from past studies on métiers. The results showed that more than 50% of the vessels were engaged in the octopus fishery year-round, using traps, while a small percentage (~13%) were entirely dedicated to clam dredging. In general, gillnets (21%) were used to target monkfish, hake and bastard soles, while trammel nets (6%) were used to target cuttlefish, with some vessels alternating the fishing gears (either seasonally or annually) according to target species. The method for the initial characterization of this fleet's métiers and its efficiency with limited data is discussed, as well as the utility of this segmentation in support of management advice.

**Keywords:** fishing métiers; landing profiles; multi-gear fleet; coastal fleet; fisheries management; Portugal

## Supplementary Material

**Table S1.** Range Silhouette Class (SC) and the interpretation.

| RANGE OF SC | INTERPRETATION                                                                          |
|-------------|-----------------------------------------------------------------------------------------|
| 0.71-1.0    | A strong structure has been found                                                       |
| 0.51-0.70   | A reasonable structure has been found                                                   |
| 0.26-0.50   | The structure is weak and could be artificial. Try additional methods of data analysis. |
| ≤0.25       | No substantial structure has been found                                                 |

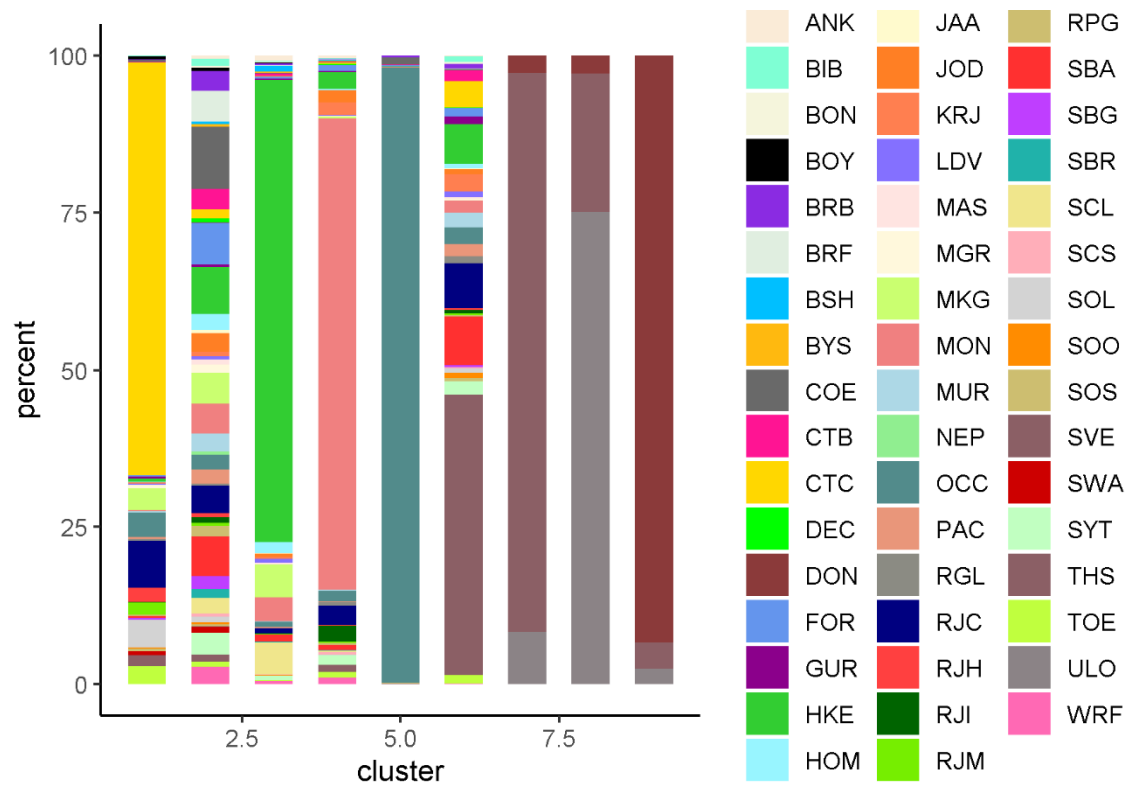

**Figure S1.** Clusters using quantity (kg) from landings data for the Algarve coastal multi-gear fishing fleet.

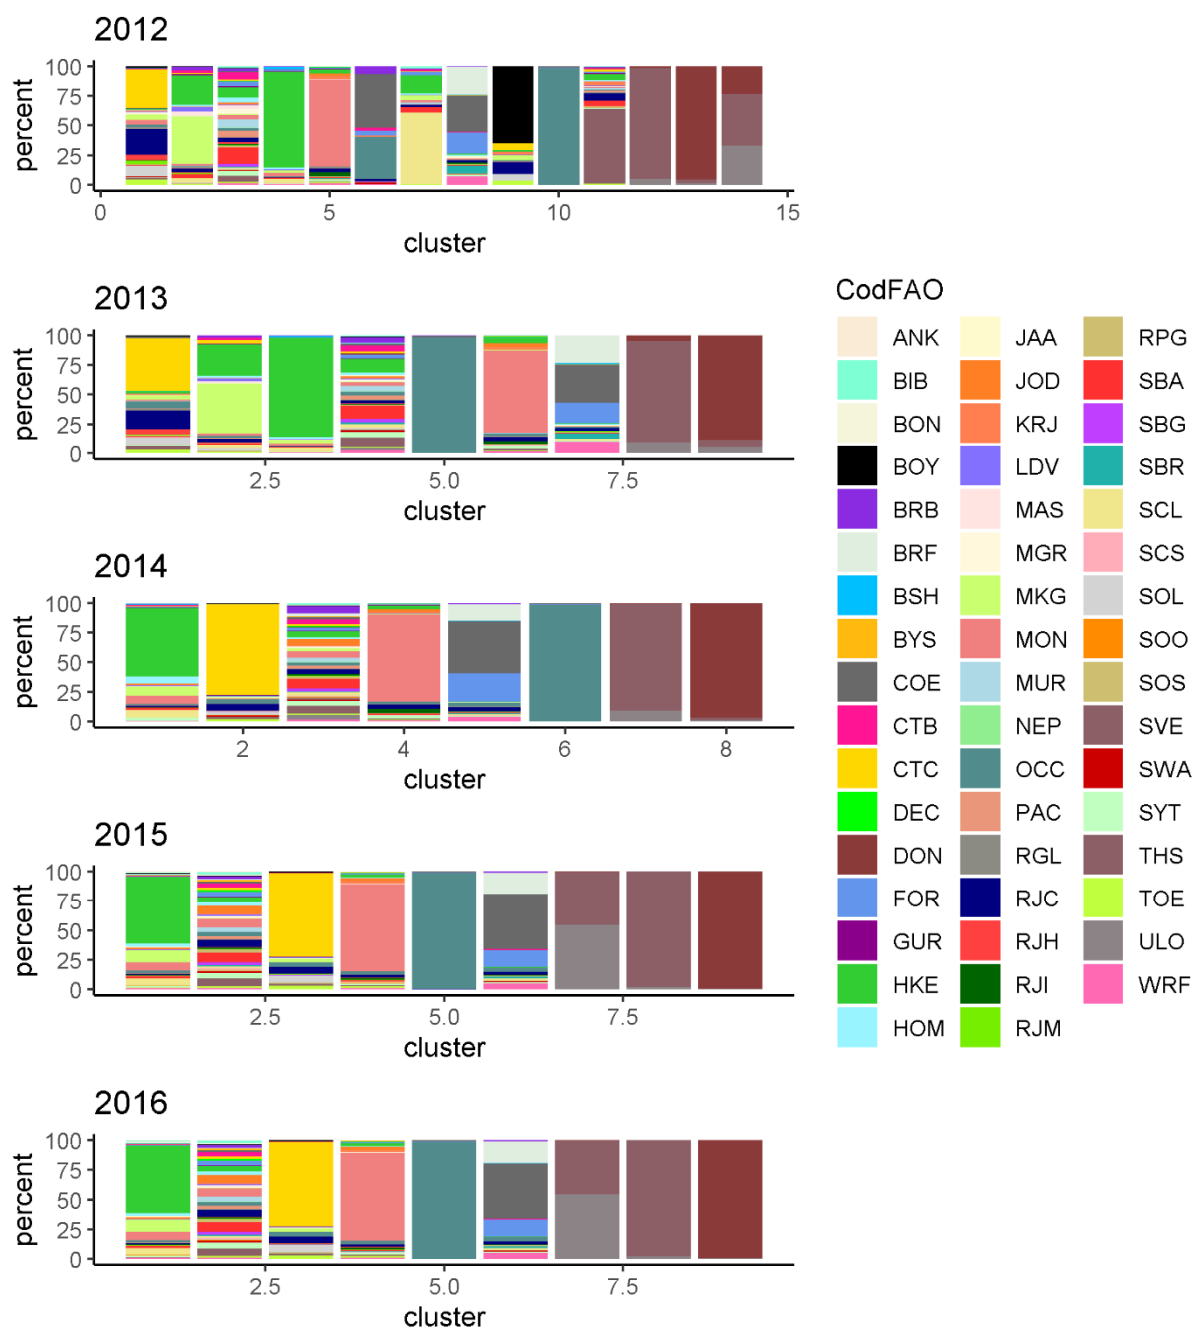

**Figure S2.** Clusters using quantity (kg) from landings data for the Algarve coastal multi-gear fishing fleet per year from 2012 to 2016. FAO codes are defined in Annex Table S2.

**Table S2.** The class, family, species (Spp), FAO codes (CodFAO) and the quantity (t) and value ( $10^5$ €) per year.

| Class          | Family       | Spp                          | Cod<br>FAO | 2012<br>(t) | 2012<br>( $10^5$ €) | 2013<br>(t) | 2013<br>( $10^5$ €) | 2014<br>(t) | 2014<br>( $10^5$ €) | 2015<br>(t) | 2015<br>( $10^5$ €) | 2016<br>(t) | 2016<br>( $10^5$ €) |
|----------------|--------------|------------------------------|------------|-------------|---------------------|-------------|---------------------|-------------|---------------------|-------------|---------------------|-------------|---------------------|
| Actinopterygii |              |                              |            |             |                     |             |                     |             |                     |             |                     |             |                     |
|                | Congridae    | <i>Conger conger</i>         | COE        | 54.23       | 1.43                | 51.93       | 1.36                | 62.92       | 1.69                | 54.37       | 1.47                | 50.39       | 1.50                |
|                | Lophidae     | <i>Lophius piscatorius</i>   | MON        | 132.91      | 6.92                | 114.39      | 6.41                | 150.83      | 8.74                | 146.81      | 8.97                | 76.50       | 4.95                |
|                | Merlucciidae | <i>Merluccius merluccius</i> | HKE        | 134.69      | 3.54                | 151.27      | 3.86                | 107.84      | 3.59                | 126.64      | 3.70                | 108.48      | 3.18                |

|             |                               |     |        |       |         |       |        |       |        |       |        |       |
|-------------|-------------------------------|-----|--------|-------|---------|-------|--------|-------|--------|-------|--------|-------|
| Soleidae    | <i>Microchirus variegatus</i> | MKG | 39.93  | 3.56  | 38.97   | 3.39  | 20.50  | 1.84  | 23.92  | 2.19  | 26.62  | 2.77  |
| Cephalopoda |                               |     | 0.00   | 0.00  | 0.00    | 0.00  | 0.00   | 0.00  | 0.00   | 0.00  | 0.00   | 0.00  |
| Octopodidae | <i>Octopus vulgaris</i>       | OCC | 617.41 | 28.16 | 1151.43 | 37.50 | 895.18 | 46.40 | 734.01 | 40.06 | 661.45 | 37.22 |
| Sepiidae    | <i>Sepia officinalis</i>      | CTC | 31.54  | 1.44  | 49.81   | 1.74  | 50.34  | 1.70  | 29.15  | 1.20  | 30.87  | 1.41  |
| Bivalvia    |                               |     | 0.00   | 0.00  | 0.00    | 0.00  | 0.00   | 0.00  | 0.00   | 0.00  | 0.00   | 0.00  |
| Donacidae   | <i>Donax</i> spp.             | DON | 49.11  | 1.23  | 64.22   | 1.60  | 34.81  | 0.86  | 38.83  | 0.97  | 33.53  | 0.83  |
| Matridae    | <i>Spisula solida</i>         | ULO | 32.85  | 0.25  | 21.55   | 0.16  | 30.90  | 0.23  | 90.93  | 0.68  | 143.51 | 1.08  |
| Veneridae   | <i>Chamelea gallina</i>       | SVE | 122.13 | 1.83  | 115.89  | 1.75  | 161.80 | 2.43  | 226.40 | 3.40  | 39.35  | 0.59  |

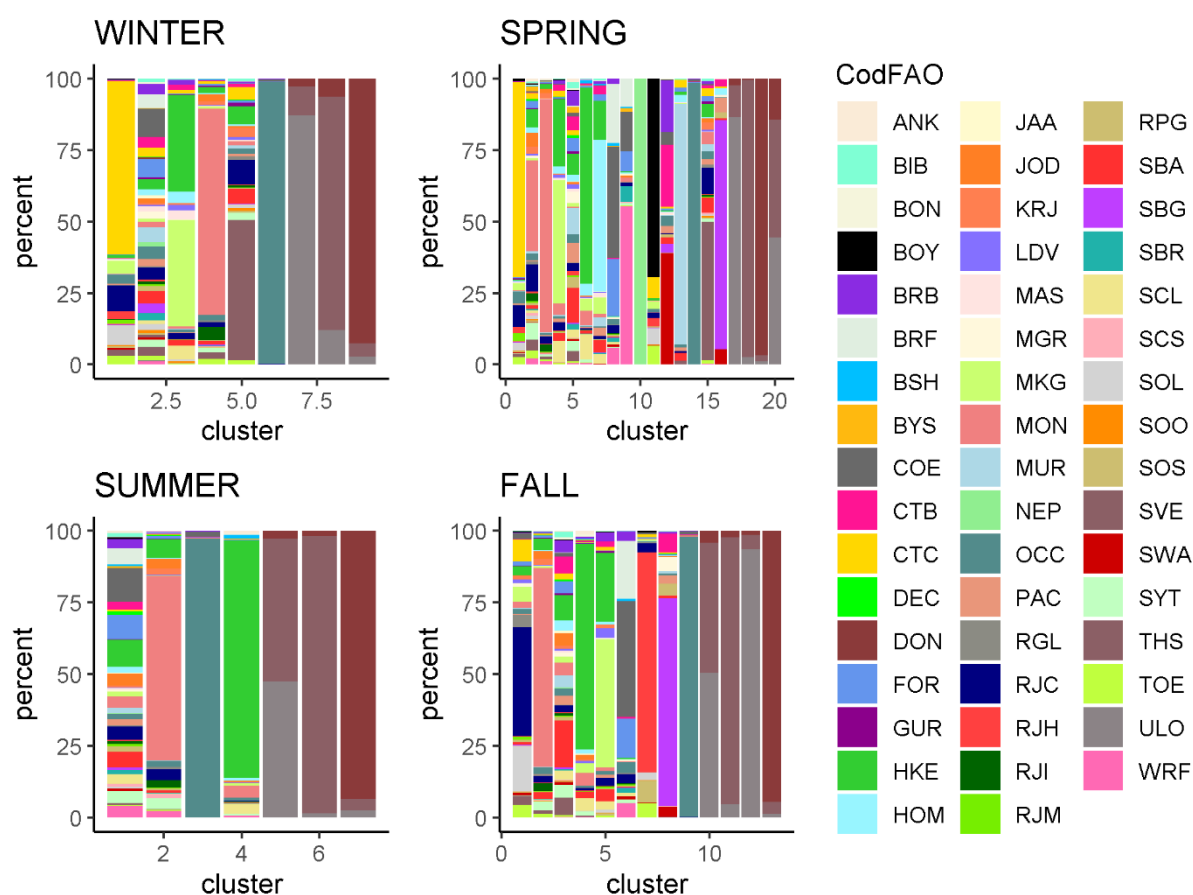

**Figure S3.** Clusters using quantity (kg) from landings data for the Algarve coastal multi-gear fishing fleet per year for Winter, Spring, Summer and Fall. FAO codes are defined in Annex Table S3.

**Table S3.** The class, family, species (Spp), FAO codes (CodFAO) and the quantity (q) and value (v) per season [Win = Winter; Spr = Spring; Sum = Summer; Fall].

| Class          | Family       | Spp                          | CodFAO | Win (t) | Win (10 <sup>5</sup> €) | Spr (t) | Spr (10 <sup>5</sup> €) | Sum (t) | Sum (10 <sup>5</sup> €) | Fall (t) | Fall (10 <sup>5</sup> €) |
|----------------|--------------|------------------------------|--------|---------|-------------------------|---------|-------------------------|---------|-------------------------|----------|--------------------------|
| Actinopterygii |              |                              |        |         |                         |         |                         |         |                         |          |                          |
|                | Lophidae     | <i>Lophius piscatorius</i>   | MON    | 47.41   | 3.60                    | 287.93  | 13.83                   | 156.67  | 10.55                   | 129.43   | 8.00                     |
|                | Merlucciidae | <i>Merluccius merluccius</i> | HKE    | 76.44   | 2.64                    | 102.42  | 3.06                    | 303.53  | 8.08                    | 146.53   | 4.09                     |

|              |                               |     |         |       |         |       |         |       |        |       |
|--------------|-------------------------------|-----|---------|-------|---------|-------|---------|-------|--------|-------|
| Soleidae     | <i>Microchirus</i> spp.       | THS | 83.25   | 6.95  | 24.93   | 2.25  | 5.36    | 0.63  | 31.37  | 3.11  |
|              | <i>Microchirus variegatus</i> | MKG | 66.68   | 5.49  | 25.48   | 2.31  | 13.77   | 1.44  | 44.02  | 4.51  |
| Cephalopoda  |                               |     | 0.00    | 0.00  | 0.00    | 0.00  | 0.00    | 0.00  | 0.00   | 0.00  |
| Octopodidae  | <i>Octopus vulgaris</i>       | OCC | 1099.55 | 49.44 | 1148.46 | 55.09 | 1011.59 | 48.17 | 799.90 | 36.65 |
| Sepiidae     | <i>Sepia officinalis</i>      | CTC | 94.69   | 3.72  | 79.21   | 2.81  | 4.13    | 0.23  | 13.69  | 0.73  |
| Bivalvia     |                               |     | 0.00    | 0.00  | 0.00    | 0.00  | 0.00    | 0.00  | 0.00   | 0.00  |
| Donacidae    | <i>Donax</i> spp.             | DON | 82.31   | 2.04  | 43.74   | 1.09  | 39.94   | 1.00  | 54.50  | 1.36  |
| Matridae     | <i>Spisula solida</i>         | ULO | 93.90   | 0.71  | 46.45   | 0.35  | 86.13   | 0.65  | 93.26  | 0.70  |
| Veneridae    | <i>Chamelea gallina</i>       | SVE | 72.75   | 1.10  | 83.28   | 1.25  | 368.93  | 5.53  | 140.62 | 2.11  |
| Gastropoda   |                               |     | 0.00    | 0.00  | 0.00    | 0.00  | 0.00    | 0.00  | 0.00   | 0.00  |
| Muricidae    | <i>Bolinus brandaris</i>      | BOY | 0.68    | 0.12  | 5.29    | 0.76  | 5.69    | 0.92  | 0.97   | 0.21  |
| Malacostraca |                               |     | 0.00    | 0.00  | 0.00    | 0.00  | 0.00    | 0.00  | 0.00   | 0.00  |
| Nephoridae   | <i>Nephrops norvegicus</i>    | NEP | 5.33    | 3.81  | 1.94    | 0.93  | 1.90    | 0.99  | 1.74   | 0.92  |
